# Supplementary material for: Transparent Pullulan/Mica Nanocomposite Coatings with Outstanding Oxygen Barrier Properties
Source: Preprints.org preprint supplement (doi:10.20944/preprints201709.0002.v1), 2017-09-01
Supplement: Supplementary file 2 [file supplementary]

Supporting Information

**Table S1.** Correlation factors between the free parameters of the fitting of the ellipsometry data for the different samples.

| **Sample** | **Correlation factors** | | nA | nB (μm2) | t (nm) | tn-u (%) |
| --- | --- | --- | --- | --- | --- | --- |
| PET | nA | | - | 94.3% | - | - |
| nB (μm2) | |  | - | - | - |
| t (nm) | |  |  | - | - |
| tn-u (%) | |  |  |  | - |
| pullulan | nA | | - | 67.9% | 33.5% | 46.9% |
| nB (μm2) | |  | - | 31.7% | 2.2% |
| t (nm) | |  |  | - | 44.4% |
| tn-u (%) | |  |  |  | - |
| Pullulan/mica  0.2 wt% | | nA | - | 70.4% | 4.3% | 27.6% |
| nB (μm2) |  | - | 2.2% | 64.8% |
| t (nm) |  |  | - | 61.4% |
| tn-u (%) |  |  |  | - |
